# Supplementary material
Source: publisher figshare collection journal article supplement (https://acs.figshare.com/ndownloader/files/4092928)
Supplement: Supplementary file 1 [file 4092928]

Supporting Information for

# Multicolor Fluorescent Semiconducting Polymer Dots with Narrow Emissions and High Brightness

*Yu Rong<sup>†</sup>, Changfeng Wu<sup>§</sup>, Jiangbo Yu<sup>†</sup>, Xuanjun Zhang<sup>‡</sup>, Fangmao Ye<sup>†</sup>, Maxwell Zeigler<sup>†</sup>, Maria Elena Gallina<sup>†</sup>, I-Che Wu<sup>†</sup>, Yong Zhang<sup>†</sup>, Yang-Hsiang Chan<sup>†</sup>, Wei Sun<sup>†</sup>, Kajsa Uvdal<sup>‡</sup>, Daniel T. Chiu<sup>†\*</sup>*

<sup>†</sup>Department of Chemistry, University of Washington, Seattle, Washington 98195, United States

<sup>§</sup>State Key Laboratory on Integrated Optoelectronics, College of Electronic Science and Engineering, Jilin University, Changchun 130012, China

<sup>‡</sup> Division of Molecular Surface Physics & Nanoscience, Department of Physics, Chemistry, and Biology, Linköping University, Linköping 58183, Sweden.

**KEYWORDS** Polymer dots • fluorescence • semiconducting polymer • bioimaging • narrow emission.

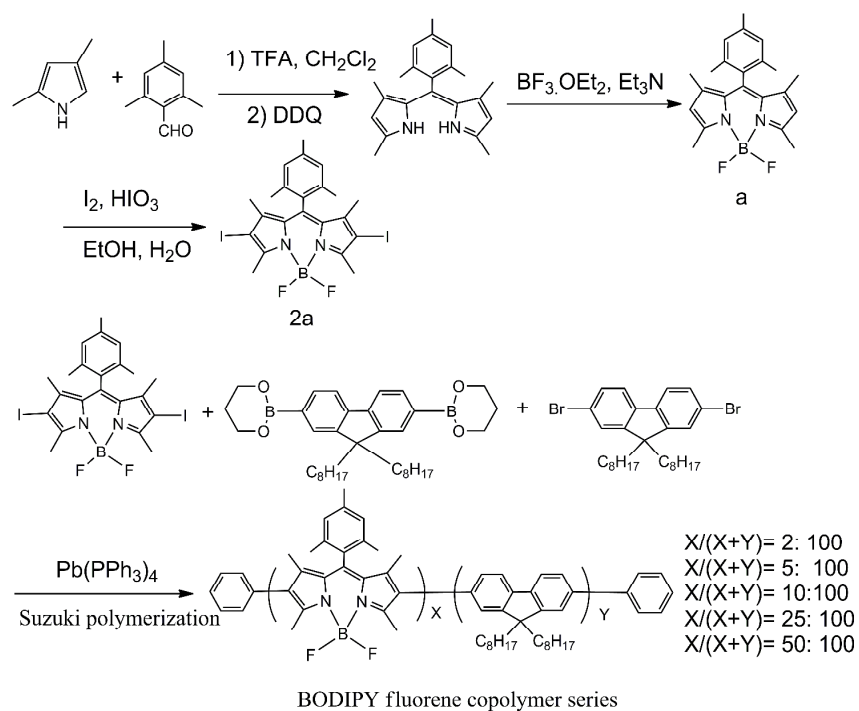

**Scheme S1.** Synthesis of BODIPY monomer a, 2a, and BODIPY fluorene copolymer series

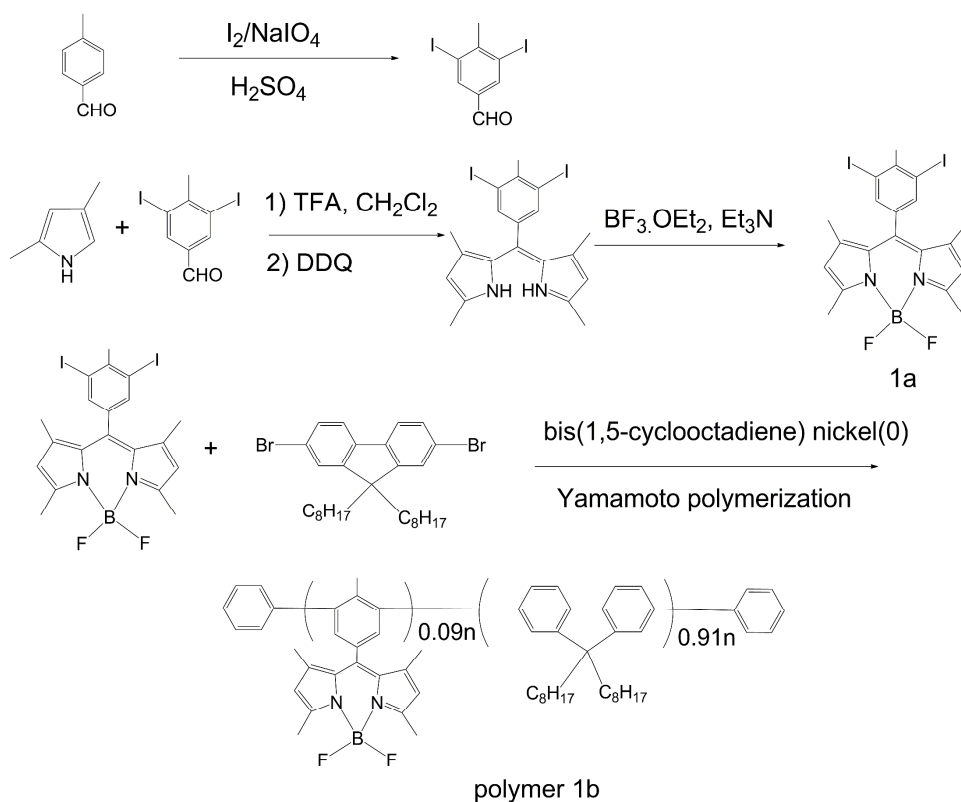

**Scheme S2.** Synthesis of monomer 1a and BODIPY fluorene copolymer 1b

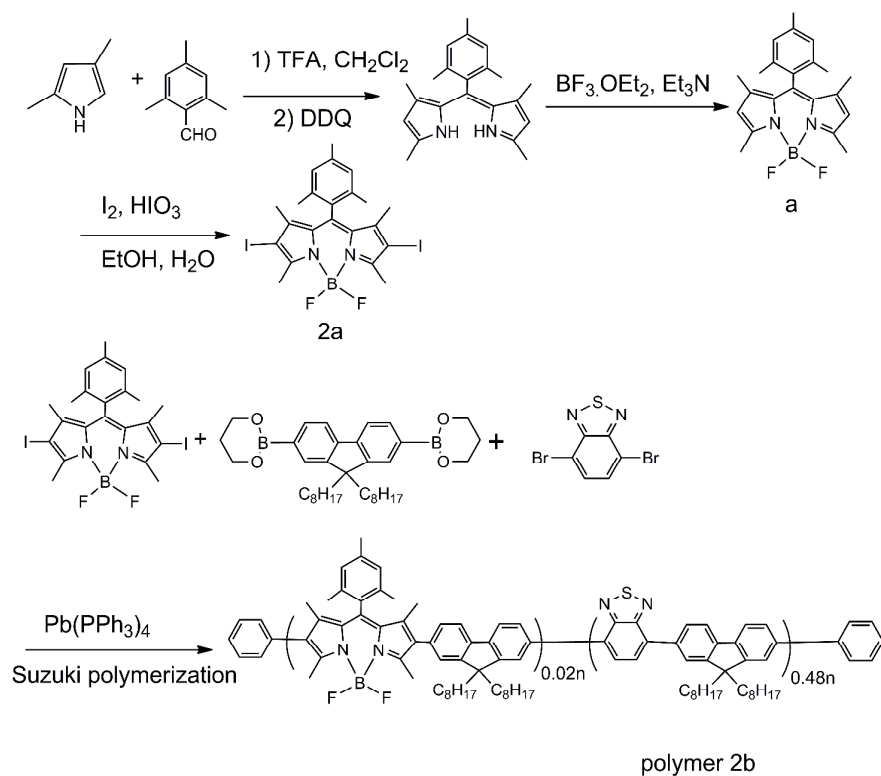

**Scheme S3.** Synthesis of monomer 2a and BODIPY fluorene copolymer 2b

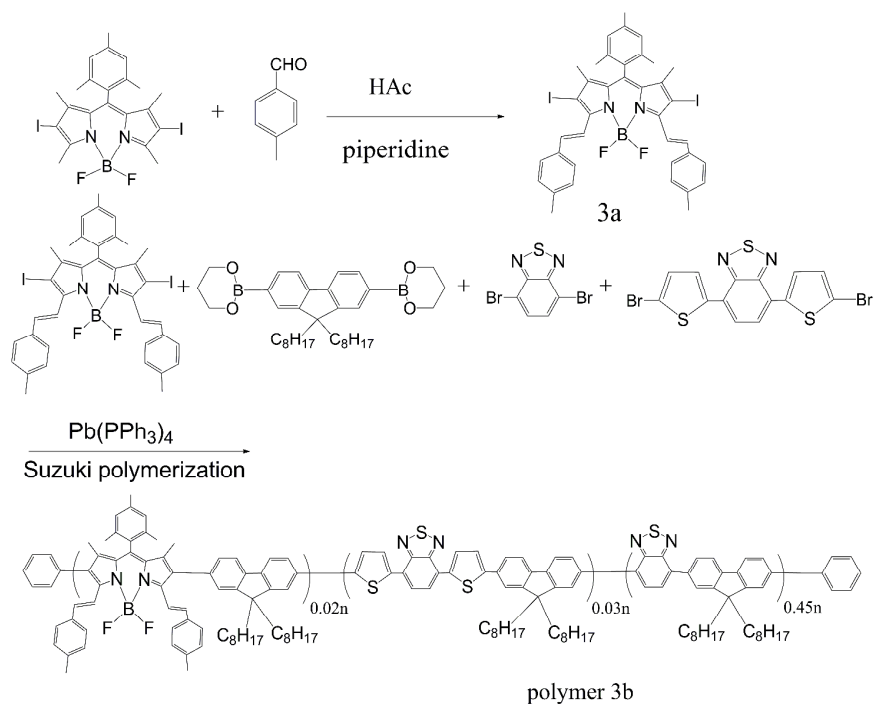

**Scheme S4.** Synthesis of monomer 3a and BODIPY fluorene copolymer 3b

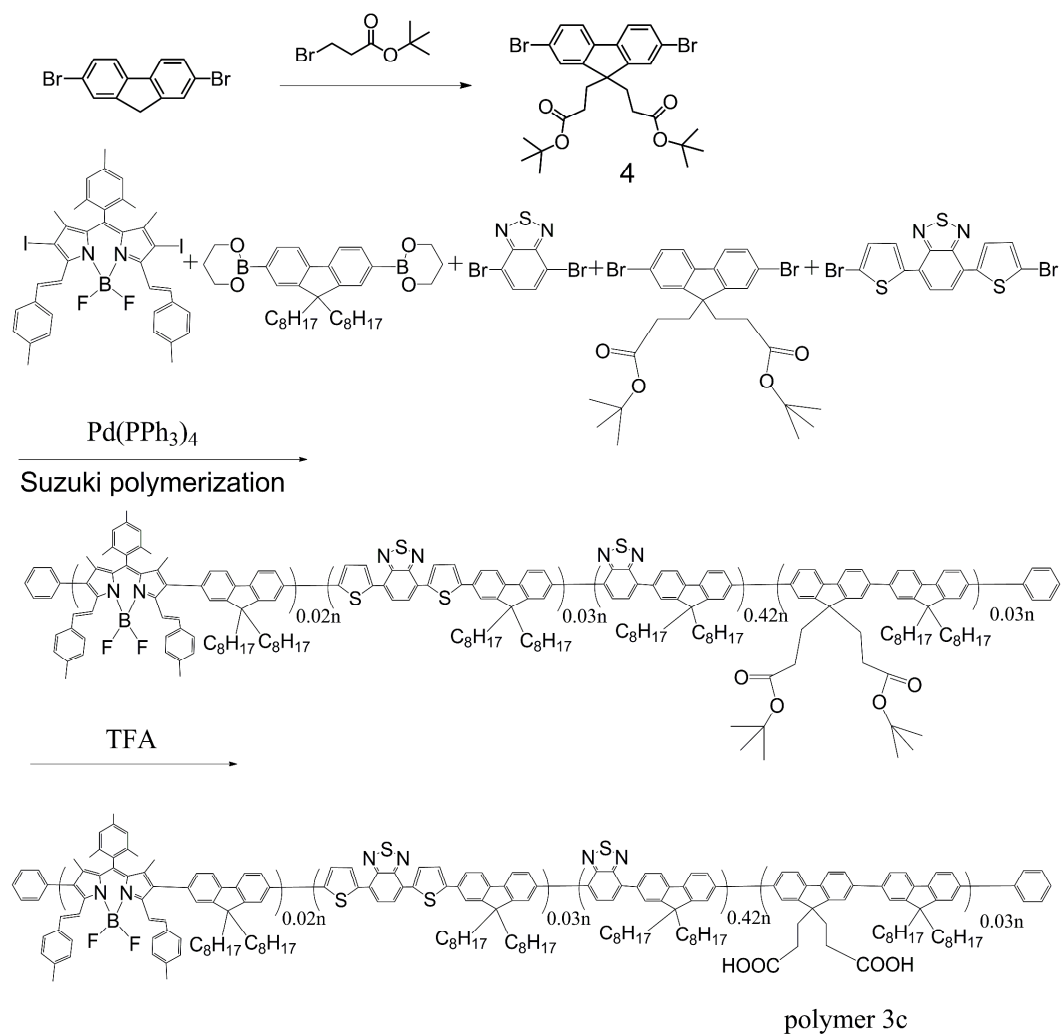

**Scheme S5.** Synthesis of BODIPY fluorene copolymer 3c

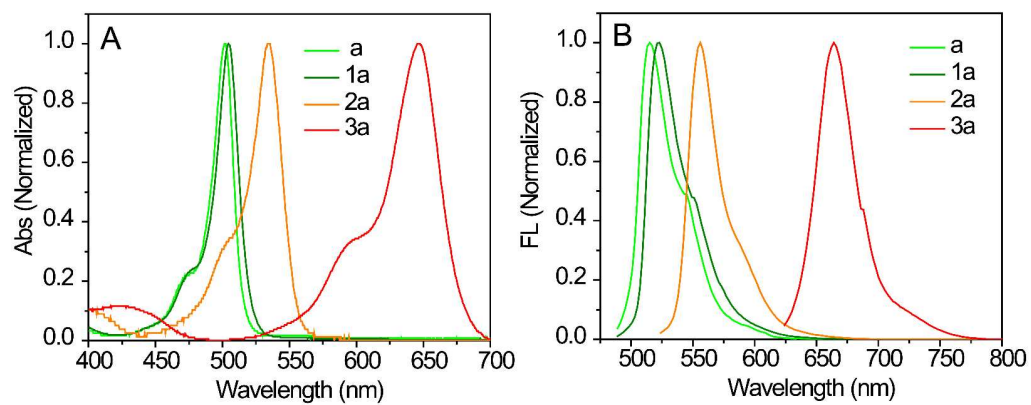

**Figure S1.** Absorption (A) and fluorescence (B) spectra of BODIPY monomer in THF solution.

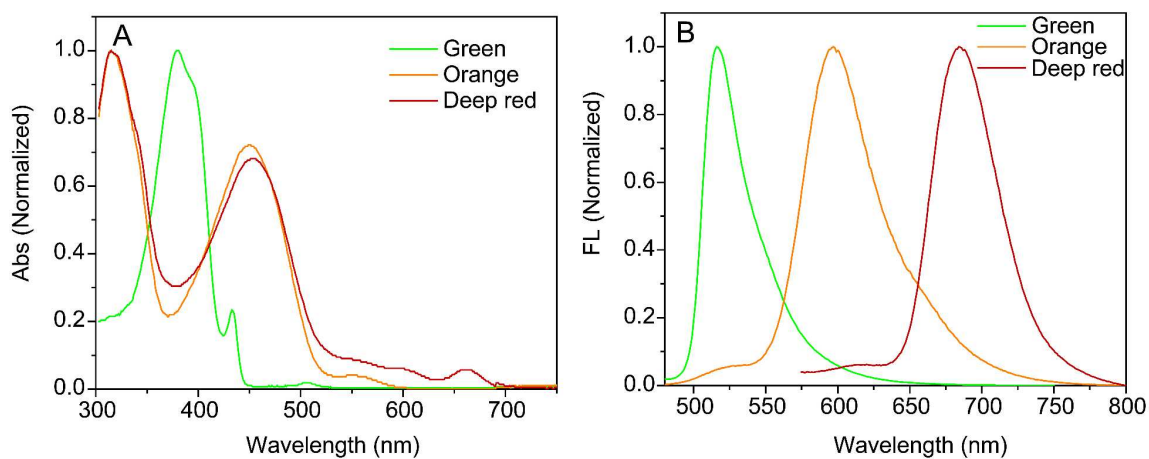

**Figure S2.** Absorption (A) and fluorescence (B) spectra of aqueous solutions of BODIPY Pdots of Polymer 1b (green), 2b (orange), and 3b (deep red). The excitation wavelength for Green, Orange, and Deep-Red Pdots was 405nm, 488nm, and 488nm, respectively.

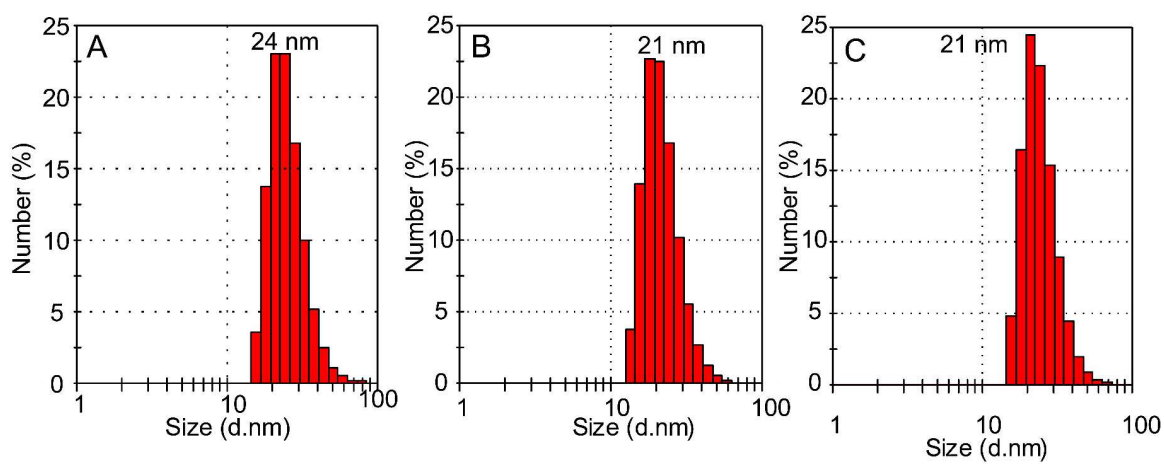

**Figure S3.** A-C: Histograms of the particle sizes measured by DLS for the BODIPY Pdots prepared from: Polymer **1b** (A); Polymer **2b** (B); Polymer **3b** (C).

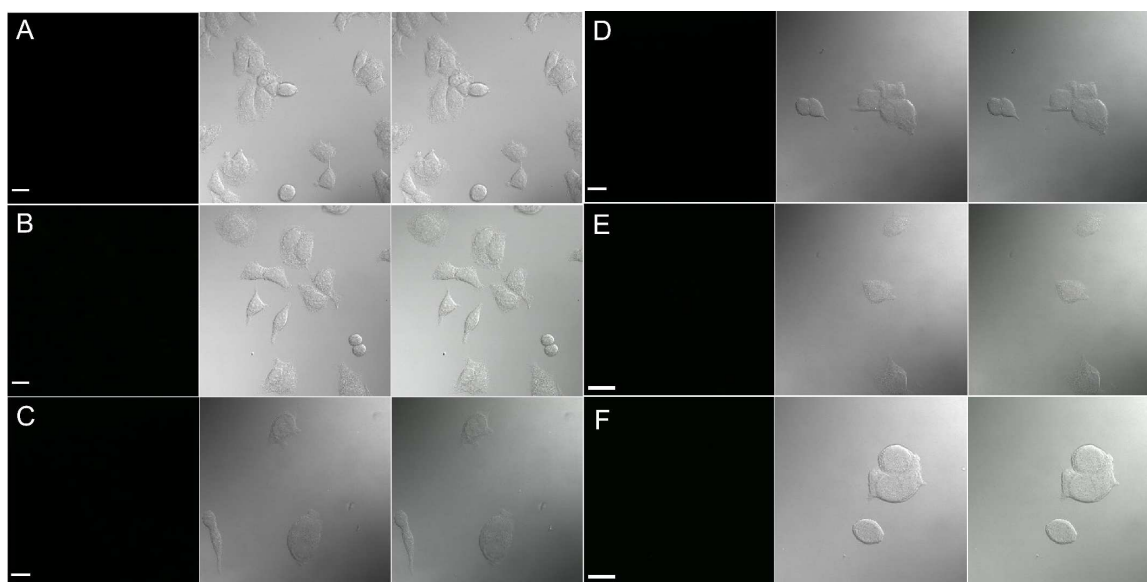

**Figure S4.** Confocal fluorescence microscopy images of MCF-7 breast-cancer cells. A-B: Negative control, where labeling was carried out under the same condition as positive labeling with BODIPY520 Pdot-SA (Figure 5a), but in the absence of EDC catalyst in the bioconjugation step (A) and in the absence of biotinylated primary antibody (B). C-D: Negative control, where labeling was carried out under the same condition as positive labeling with BODIPY600 Pdot-SA (Figure 5b), but in the absence of EDC catalyst in the bioconjugation step (C) and in the absence of biotinylated primary antibody (D). E-F: Negative control, where labeling was carried out under the same condition as positive labeling with BODIPY690 Pdot-SA (Figure 5c), but in the absence of EDC catalyst in the bioconjugation step (E) and in the absence of biotinylated primary antibody (F). Images from left to right: Fluorescence images from Pdot-SA; Nomarski (DIC) images; combined DIC and fluorescence images. All the scale bars represent 20  $\mu$ m.



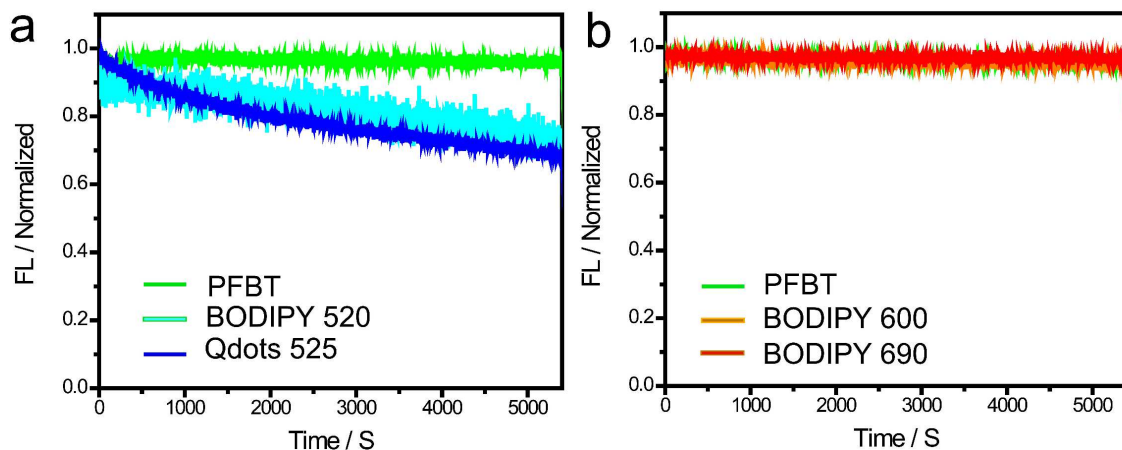

**Figure S5.** Photo-stability (normalized fluorescence intensity vs. time) of (a) PFBT/PS-PEG Pdots ( green curve,  $\lambda_{\text{ex}} = 405$  nm), Qdots 525 (blue curve,  $\lambda_{\text{ex}} = 405$  nm), BODIPY520 Pdots (cyan curve,  $\lambda_{\text{ex}} = 405$  nm) in bulk aqueous solution, respectively; (b) PFBT/PS-PEG Pdots (green curve,  $\lambda_{\text{ex}} = 488$  nm), BODIPY 600 Pdots (orange curve,  $\lambda_{\text{ex}} = 488$  nm), BODIPY 690 Pdots (red curve,  $\lambda_{\text{ex}} = 488$  nm) in bulk aqueous solution, respectively.

**Table S1.** Spectroscopic Properties of BODIPY monomers in THF.

| BODIPY monomer | $\lambda_{\text{abs max}}$ (nm) | $\lambda_{\text{em max}}$ (nm) | FWHM <sup>a</sup> (nm) | $\Phi_{\text{F}}$ <sup>b</sup> |
|----------------|---------------------------------|--------------------------------|------------------------|--------------------------------|
| <b>a</b>       | 502                             | 515                            | 36                     | 0.98                           |
| <b>1a</b>      | 504.5                           | 522                            | 35                     | 0.56                           |
| <b>2a</b>      | 534.5                           | 556                            | 28                     | 0.026                          |
| <b>3a</b>      | 646.5                           | 664                            | 36                     | 0.215                          |

<sup>a</sup> Fluorescence full width at half-maximum peak height. <sup>b</sup> Absolute photoluminescence quantum yield

**Table S2.** Spectroscopic Properties of BODIPY Pdots in water.

| Polymer Pdots           | $\lambda_{\text{abs max}}(\text{nm})$ | $\lambda_{\text{em max}}(\text{nm})$ | Life time (ns) | FWHM <sup>a</sup> (nm) | $\Phi_{\text{F}}$ <sup>b</sup> |
|-------------------------|---------------------------------------|--------------------------------------|----------------|------------------------|--------------------------------|
| Polymer <b>1b</b> Pdots | 378, 504.5                            | 516                                  | 3.11           | 41                     | 0.35                           |
| Polymer <b>2b</b> Pdots | 317, 455, 546,                        | 596                                  | 1.08           | 55                     | 0.13                           |
| Polymer <b>3c</b> Pdots | 317, 450, 538, 653                    | 688                                  | 1.60           | 53                     | 0.19                           |

<sup>a</sup> Fluorescence full width at half-maximum peak height. <sup>b</sup> Absolute photoluminescence quantum yield

**Table S3.** Size, zeta potential, and photophysical properties of BODIPY520, 600, and 690 Pdots

| Pdots     | Size <sup>[a]</sup> | $\xi$ <sup>[b]</sup> | Abs( $10^{-13} \text{ cm}^2$ ) <sup>[c]</sup>     | $\Phi$ <sup>[d]</sup> | B (CCD counts) <sup>[e]</sup>                         |
|-----------|---------------------|----------------------|---------------------------------------------------|-----------------------|-------------------------------------------------------|
| BODIPY520 | 16                  | -48.9                | 2.50 (405nm)                                      | 35                    | 33,000 (405nm)                                        |
| BODIPY600 | 18                  | -36.3                | 1.50 (488nm)                                      | 13                    | 7,000 (488nm)                                         |
| BODIPY690 | 18                  | -36.9                | 1.68 (488nm)                                      | 19                    | /                                                     |
| PFBT      | 18                  | -45.1                | $\frac{1.72 (405\text{nm})}{2.09 (488\text{nm})}$ | 30                    | $\frac{23,000 (405\text{nm})}{21,000 (488\text{nm})}$ |

<sup>[a]</sup> Size was measured by DLS. <sup>[b]</sup> Zeta potential. <sup>[c]</sup> Absorption cross-section per single Pdot. <sup>[d]</sup> Absolute photoluminescence quantum yield. <sup>[e]</sup> Single particle brightness, for PFBT, the data at 405 nm and 488 nm were not measured at the same time, therefore, the conditions may be different; BODIPY520 and PFBT were measured under the same conditions; BODIPY600 and PFBT were measured under the same conditions



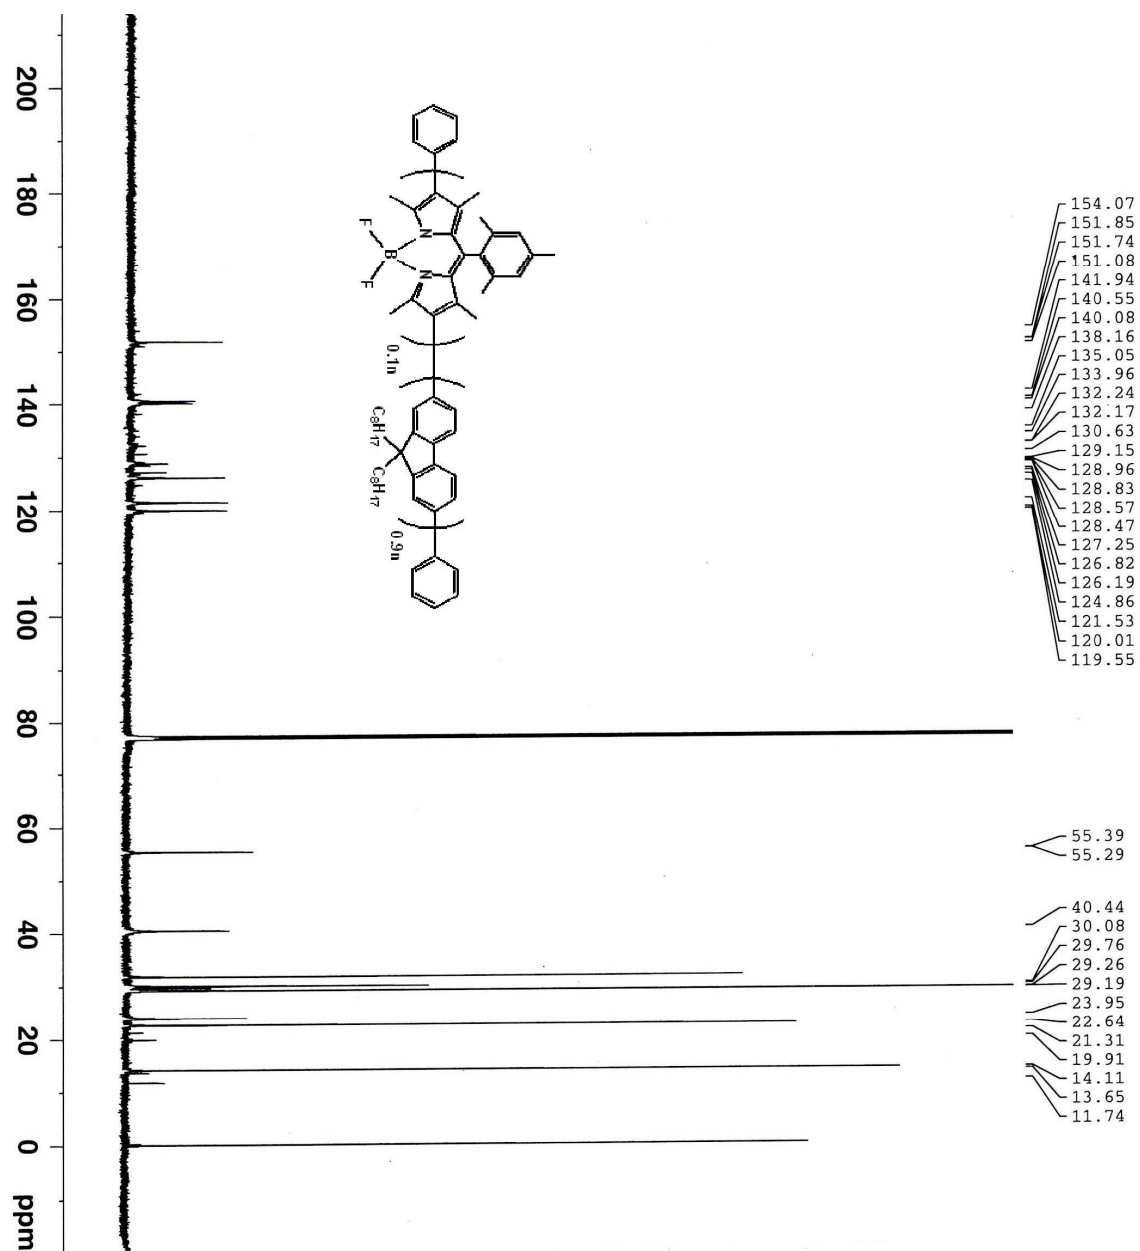

<sup>13</sup>C-NMR of 10% BODIPY fluorine copolymer

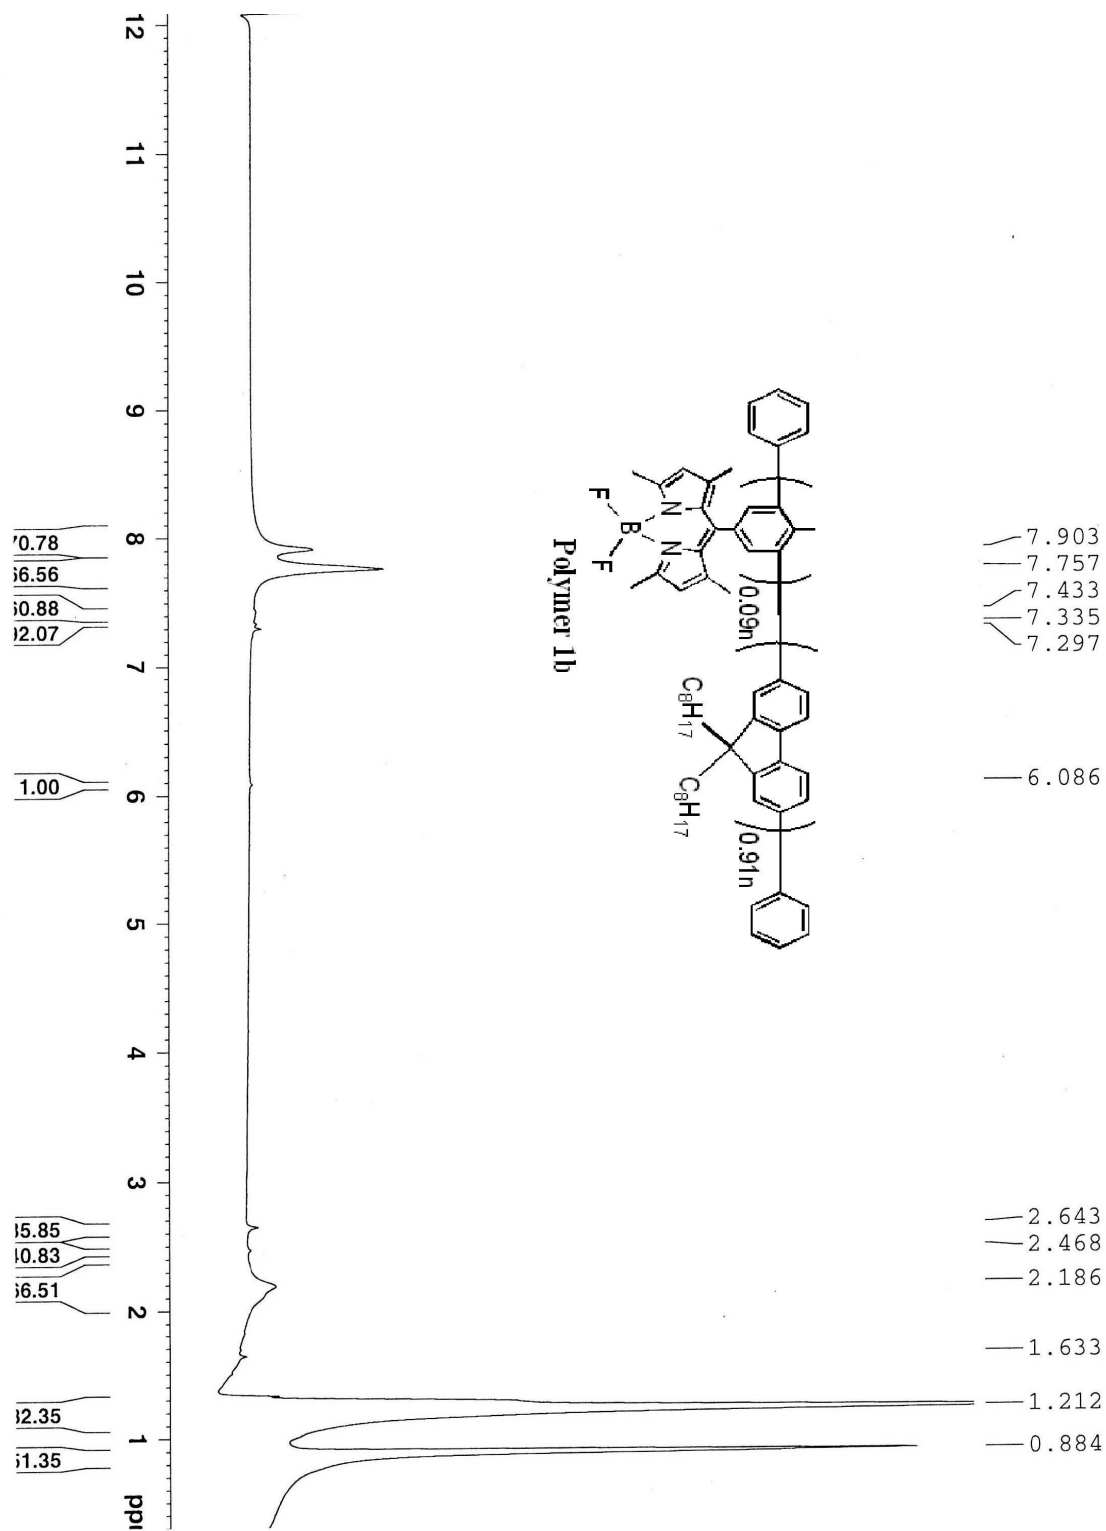

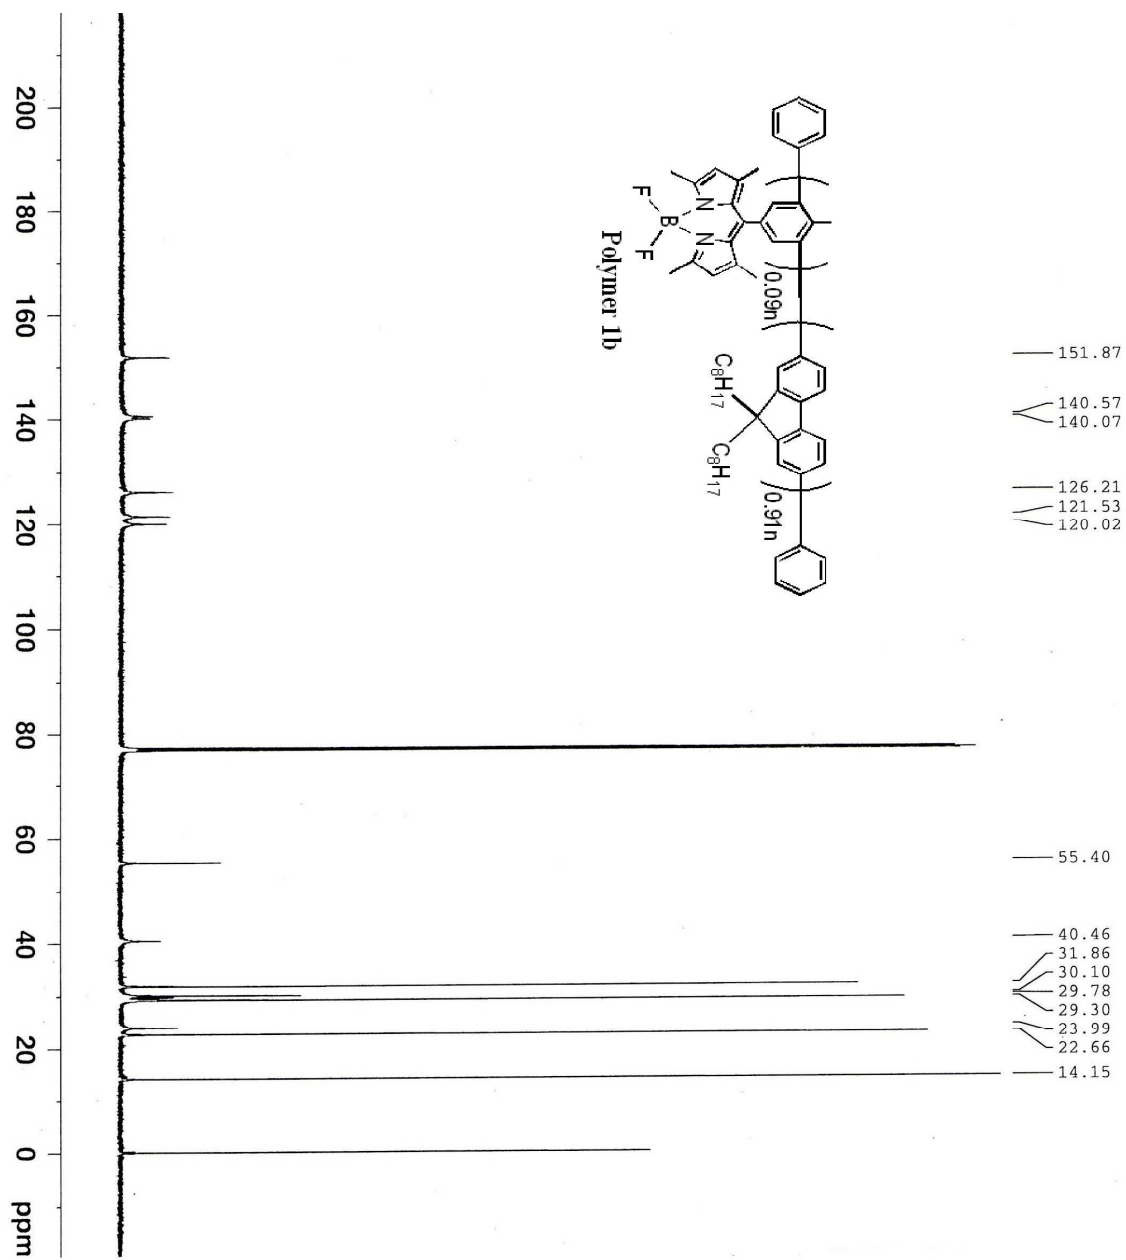

$^{13}C$ -NMR of polymer 1b



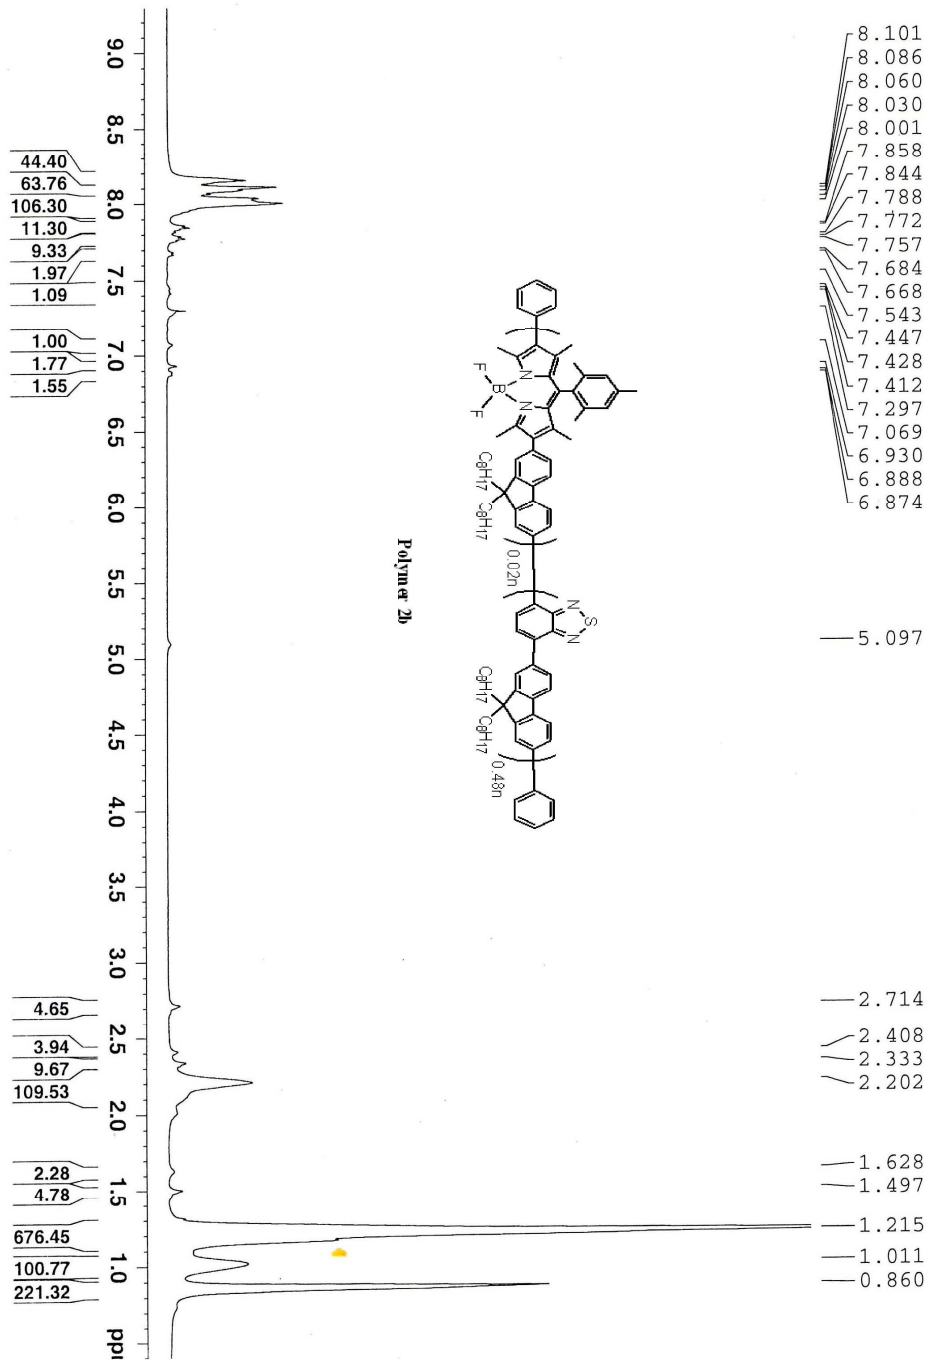

<sup>1</sup>H-NMR of polymer 2b

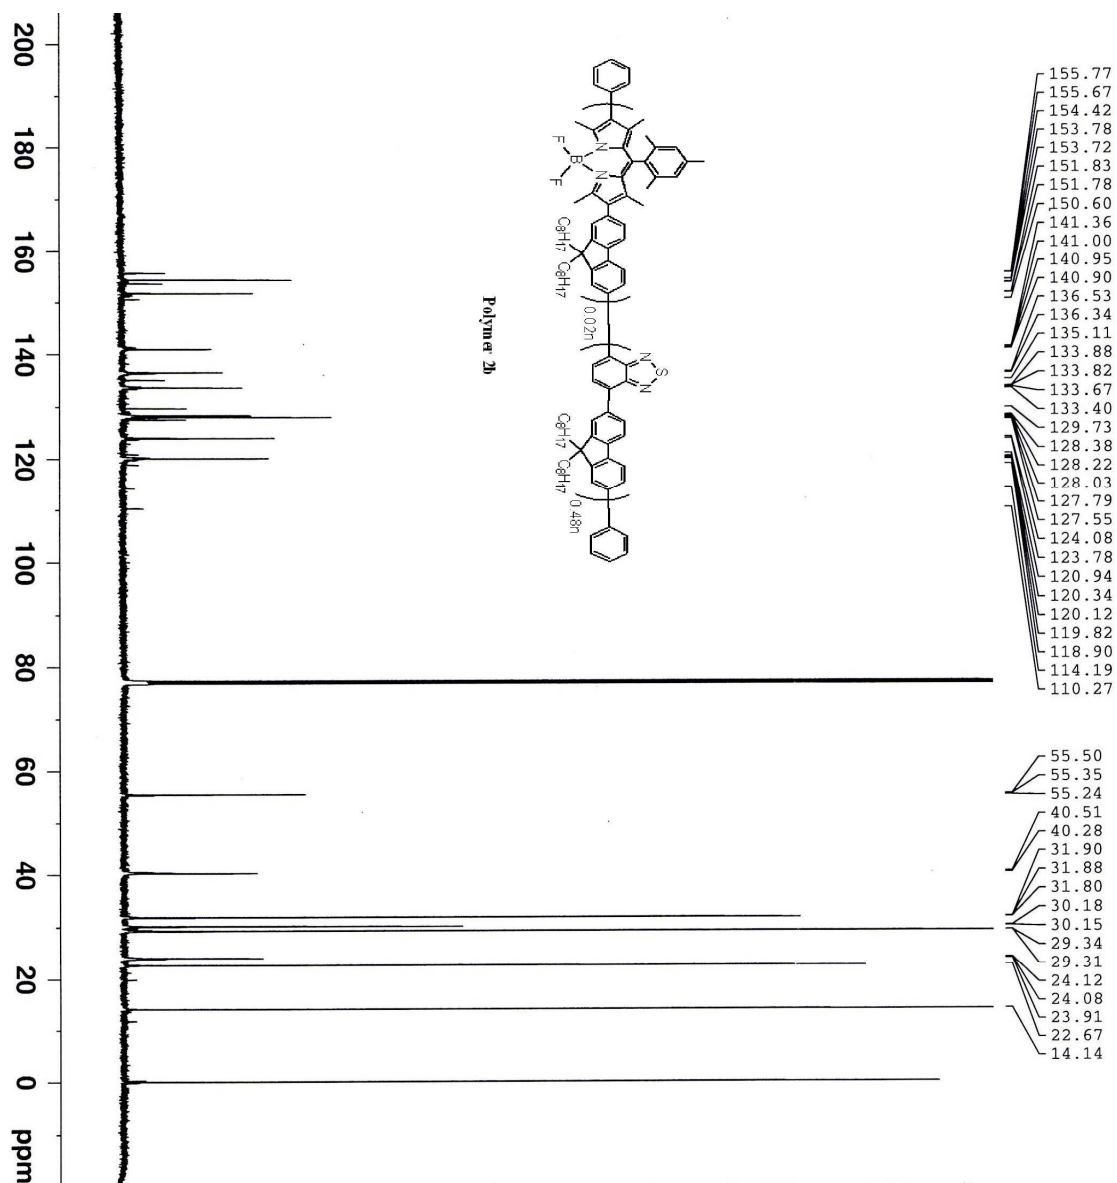

<sup>13</sup>C-NMR of polymer 2b

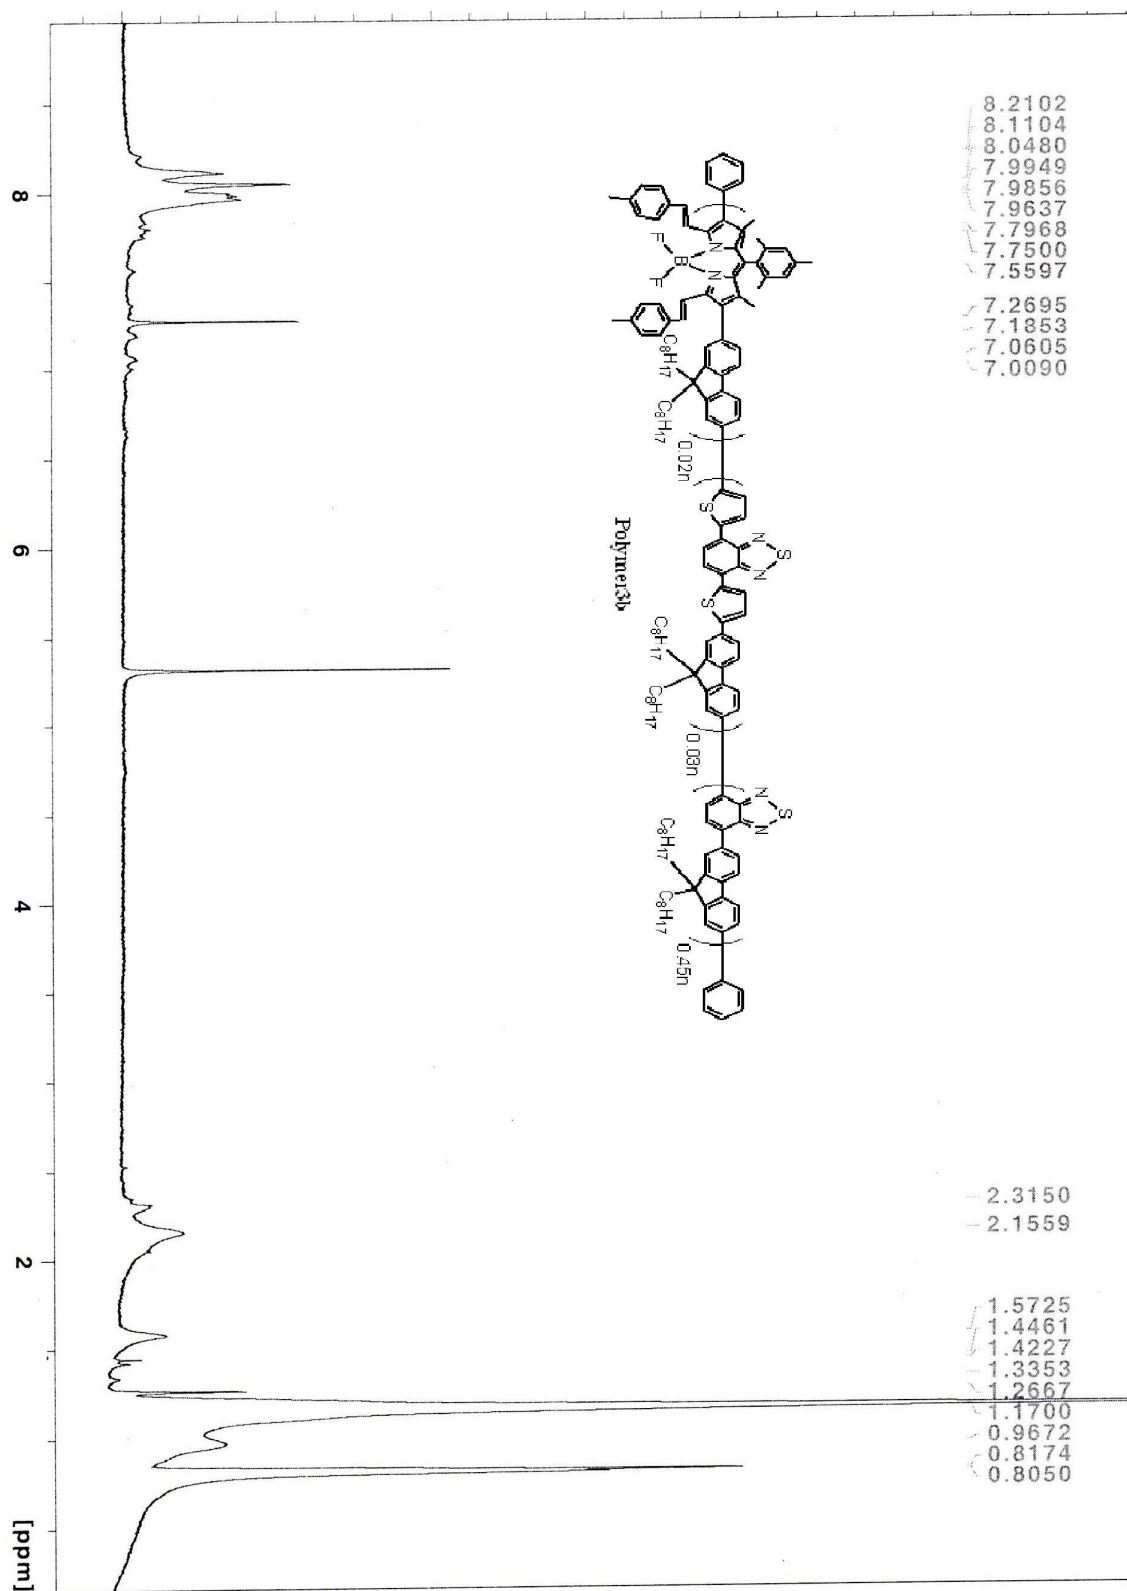

<sup>1</sup>H-NMR of polymer 3b

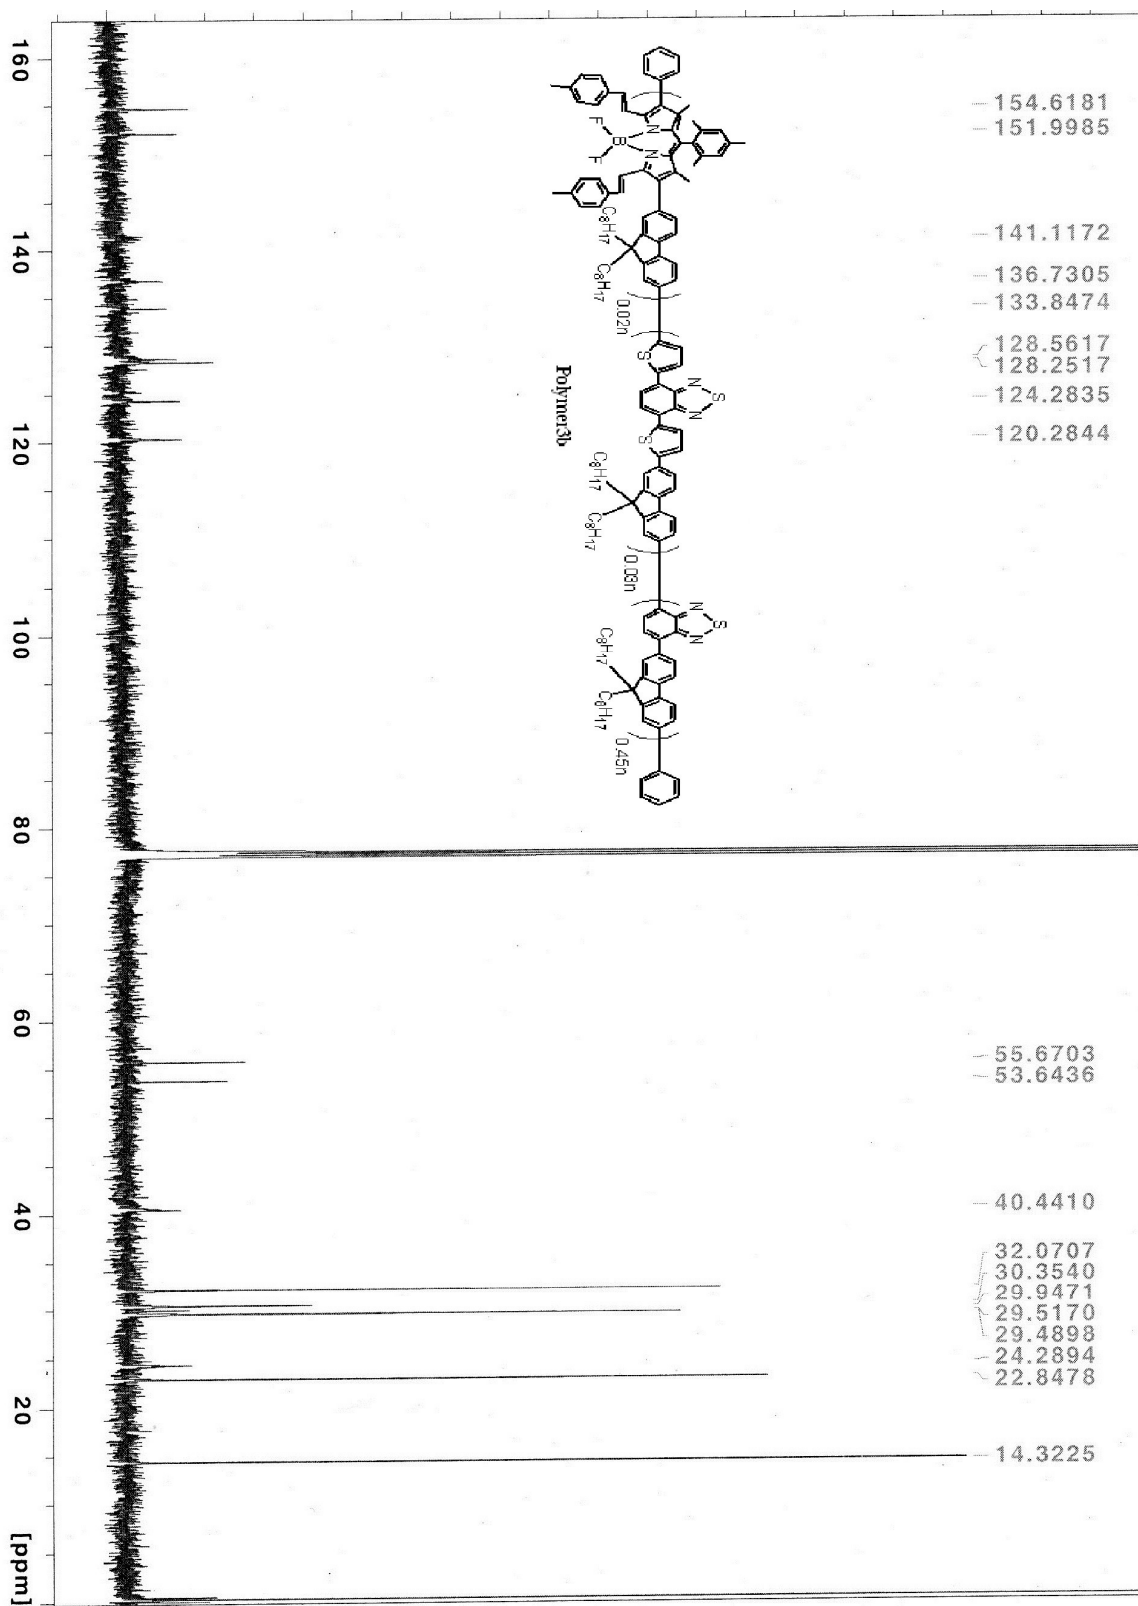

<sup>13</sup>C-NMR of polymer 3b



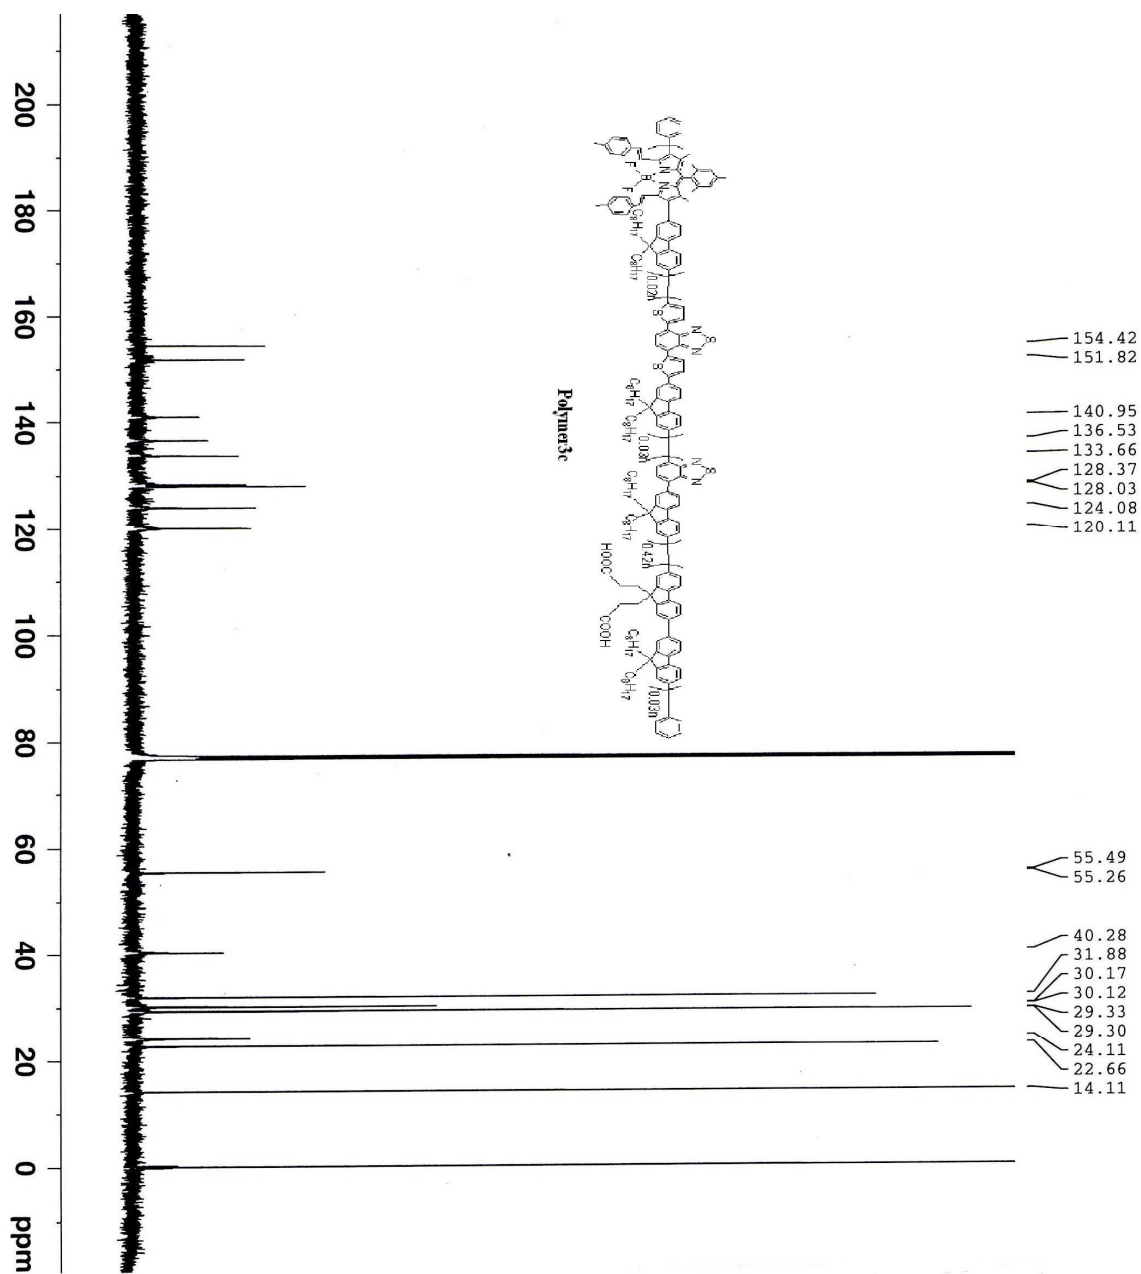

<sup>13</sup>C-NMR of polymer 3c
